# Supplementary material for: Unlocking the Functional Dynamics of ERF103 in Arabidopsis thaliana: A key player in Plant Growth Regulation
Source: Research Square preprint supplement (doi:10.21203/rs.3.rs-7070846/v1), 2025-07-17
Supplement: Supplementary file 1 [file a309d8088c906c26bcf46919.docx]

**Supplementary figures**


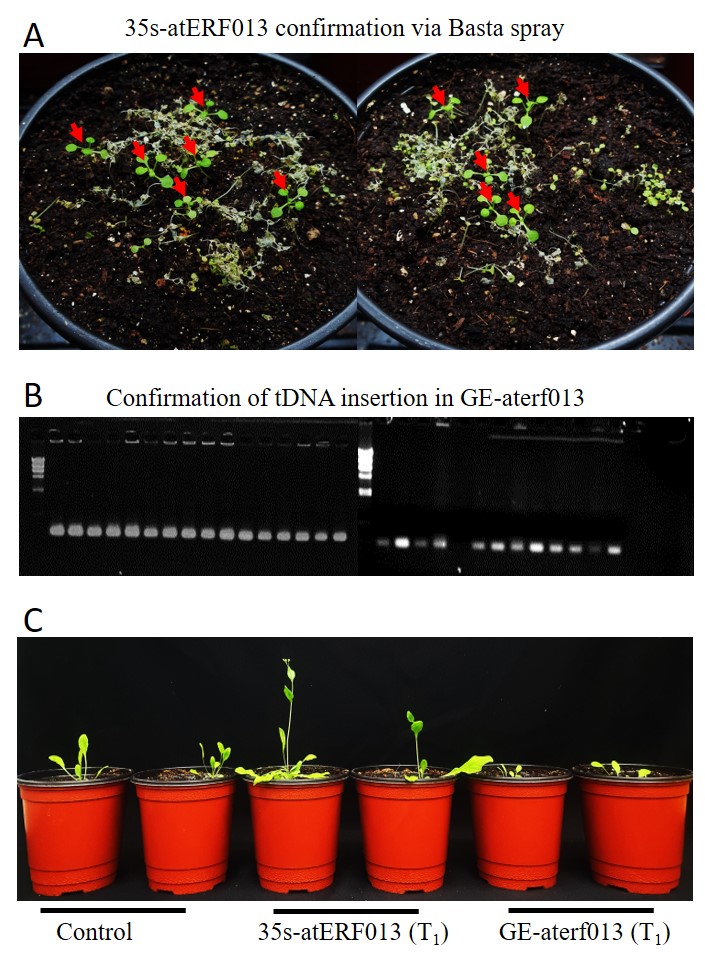


**Figure S1. Generation and Characterization of *AtERF103* Transgenic *A. thaliana* Lines.** **(A)** Verification of Basta-resistant transgenic lines. **(B)** Gel electrophoresis confirming T-DNA insertion in transgenic lines. **(C)** Growth phenotype comparison of Col-0, *35S-AtERF103*, and *GE-aterf103* lines.


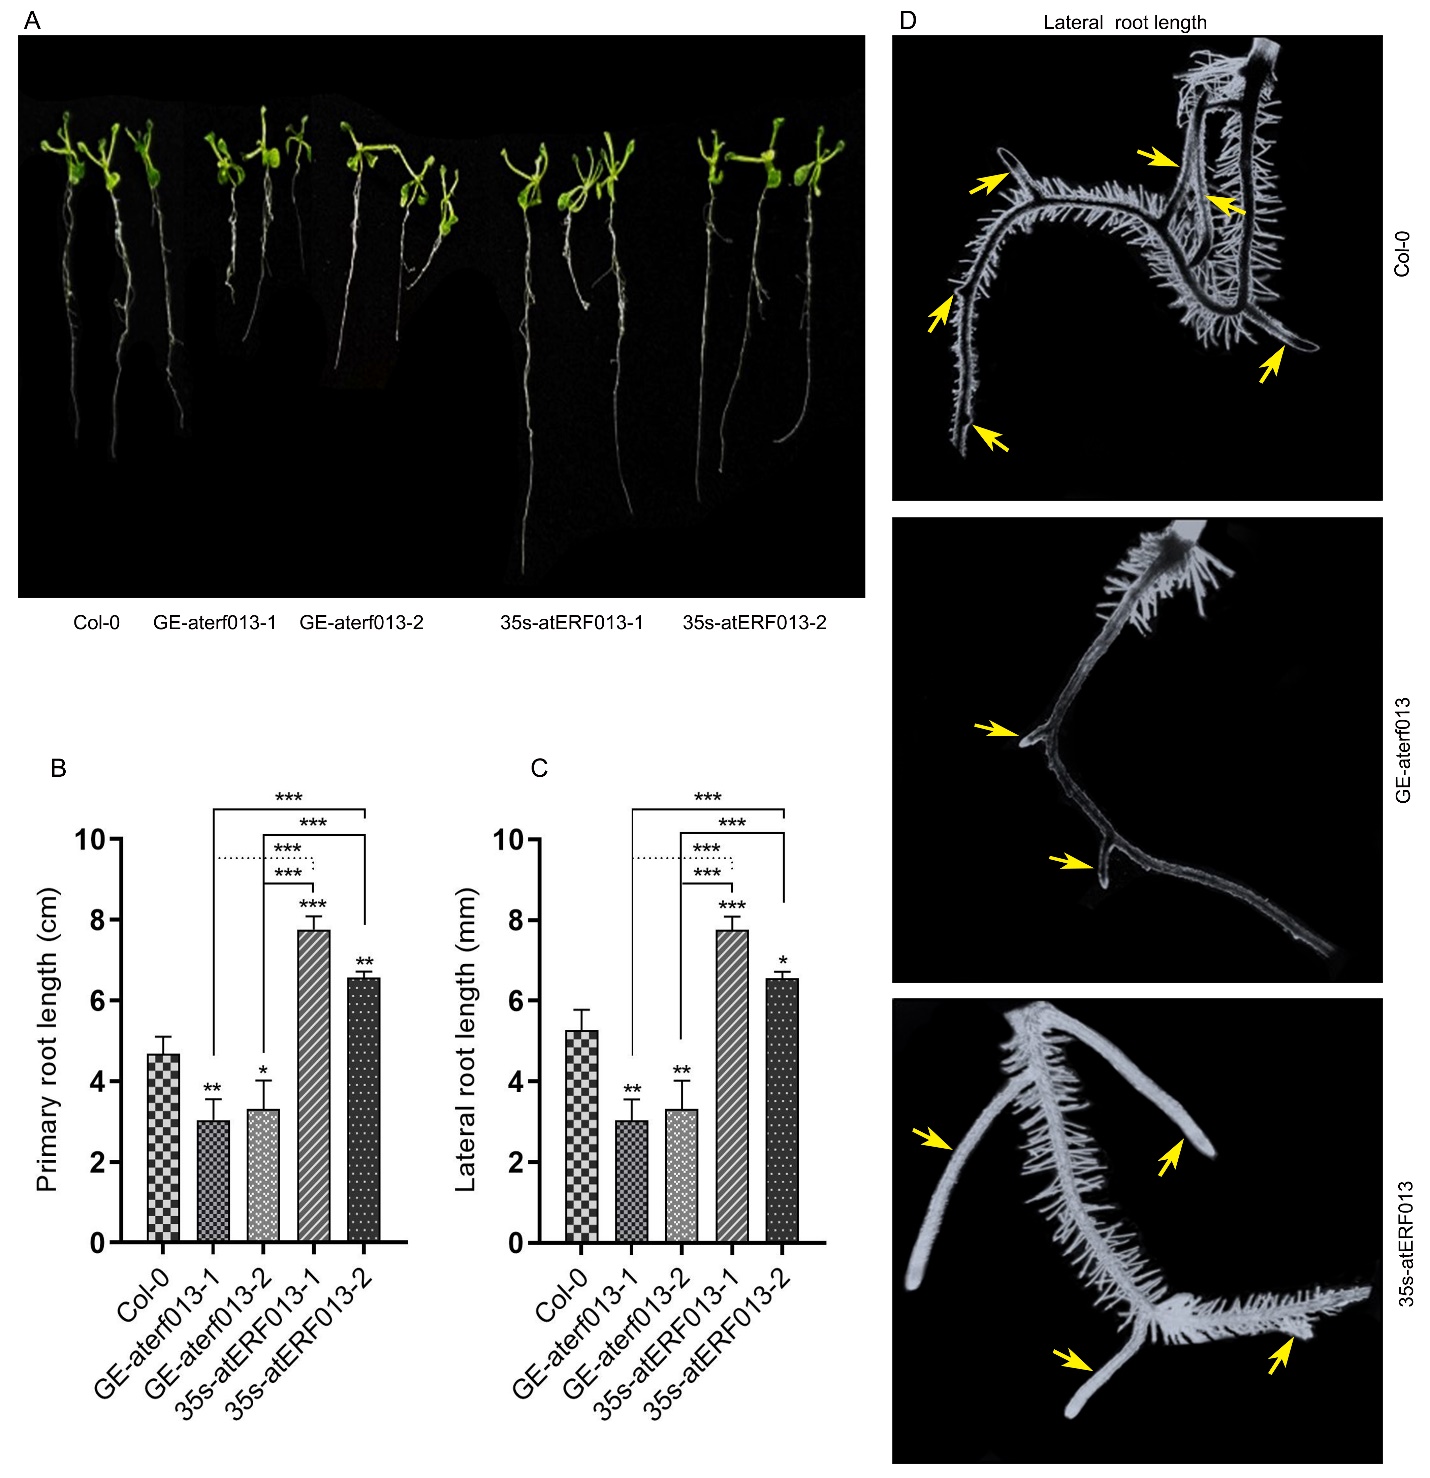


**Figure S2. Evolution of Root Phenotypes Regulated by *AtERF103*.** **(A)** Root growth patterns of the three genotypes after 1 week of growth on vertical agar plates under standard conditions. **(B)** Measurement of primary root length. **(C)** Measurement of lateral root length. **(D)** Lateral roots development in the three genotypes, indicated by arrows. Data are presented as mean ± standard deviation (SD) from multiple biological replicates. Statistical significance was assessed using post hoc multiple comparisons, with significance levels indicated as **P < 0.05*, ***P < 0.01*, and ****P < 0.001*.


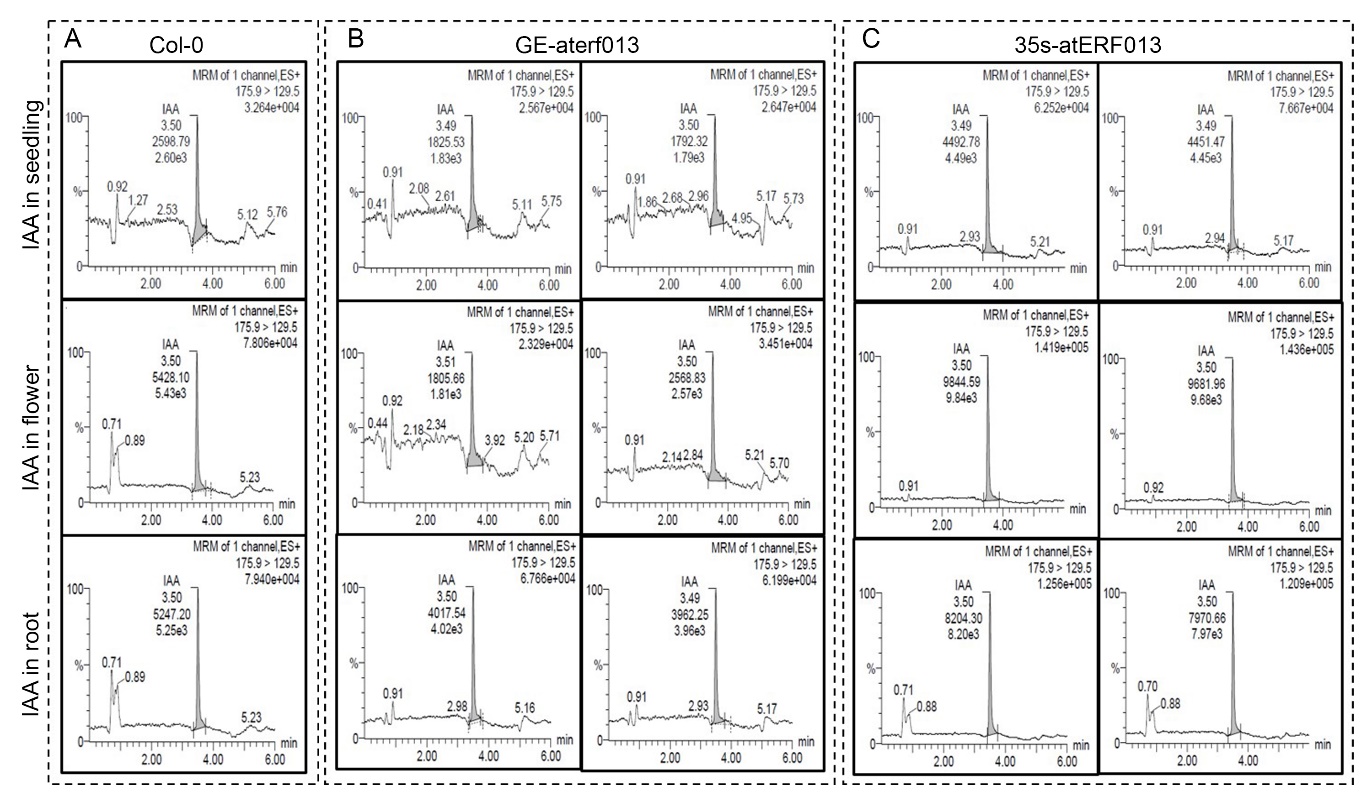


**Figure S3. LC-MS/MS Analysis of IAA Peak Area.** (**A–C):** Chromatograms of the peak area corresponding to IAA in the Col-0 (A), *GE-aterf103* (B), and *35S-atERF103* (C) genotypes.


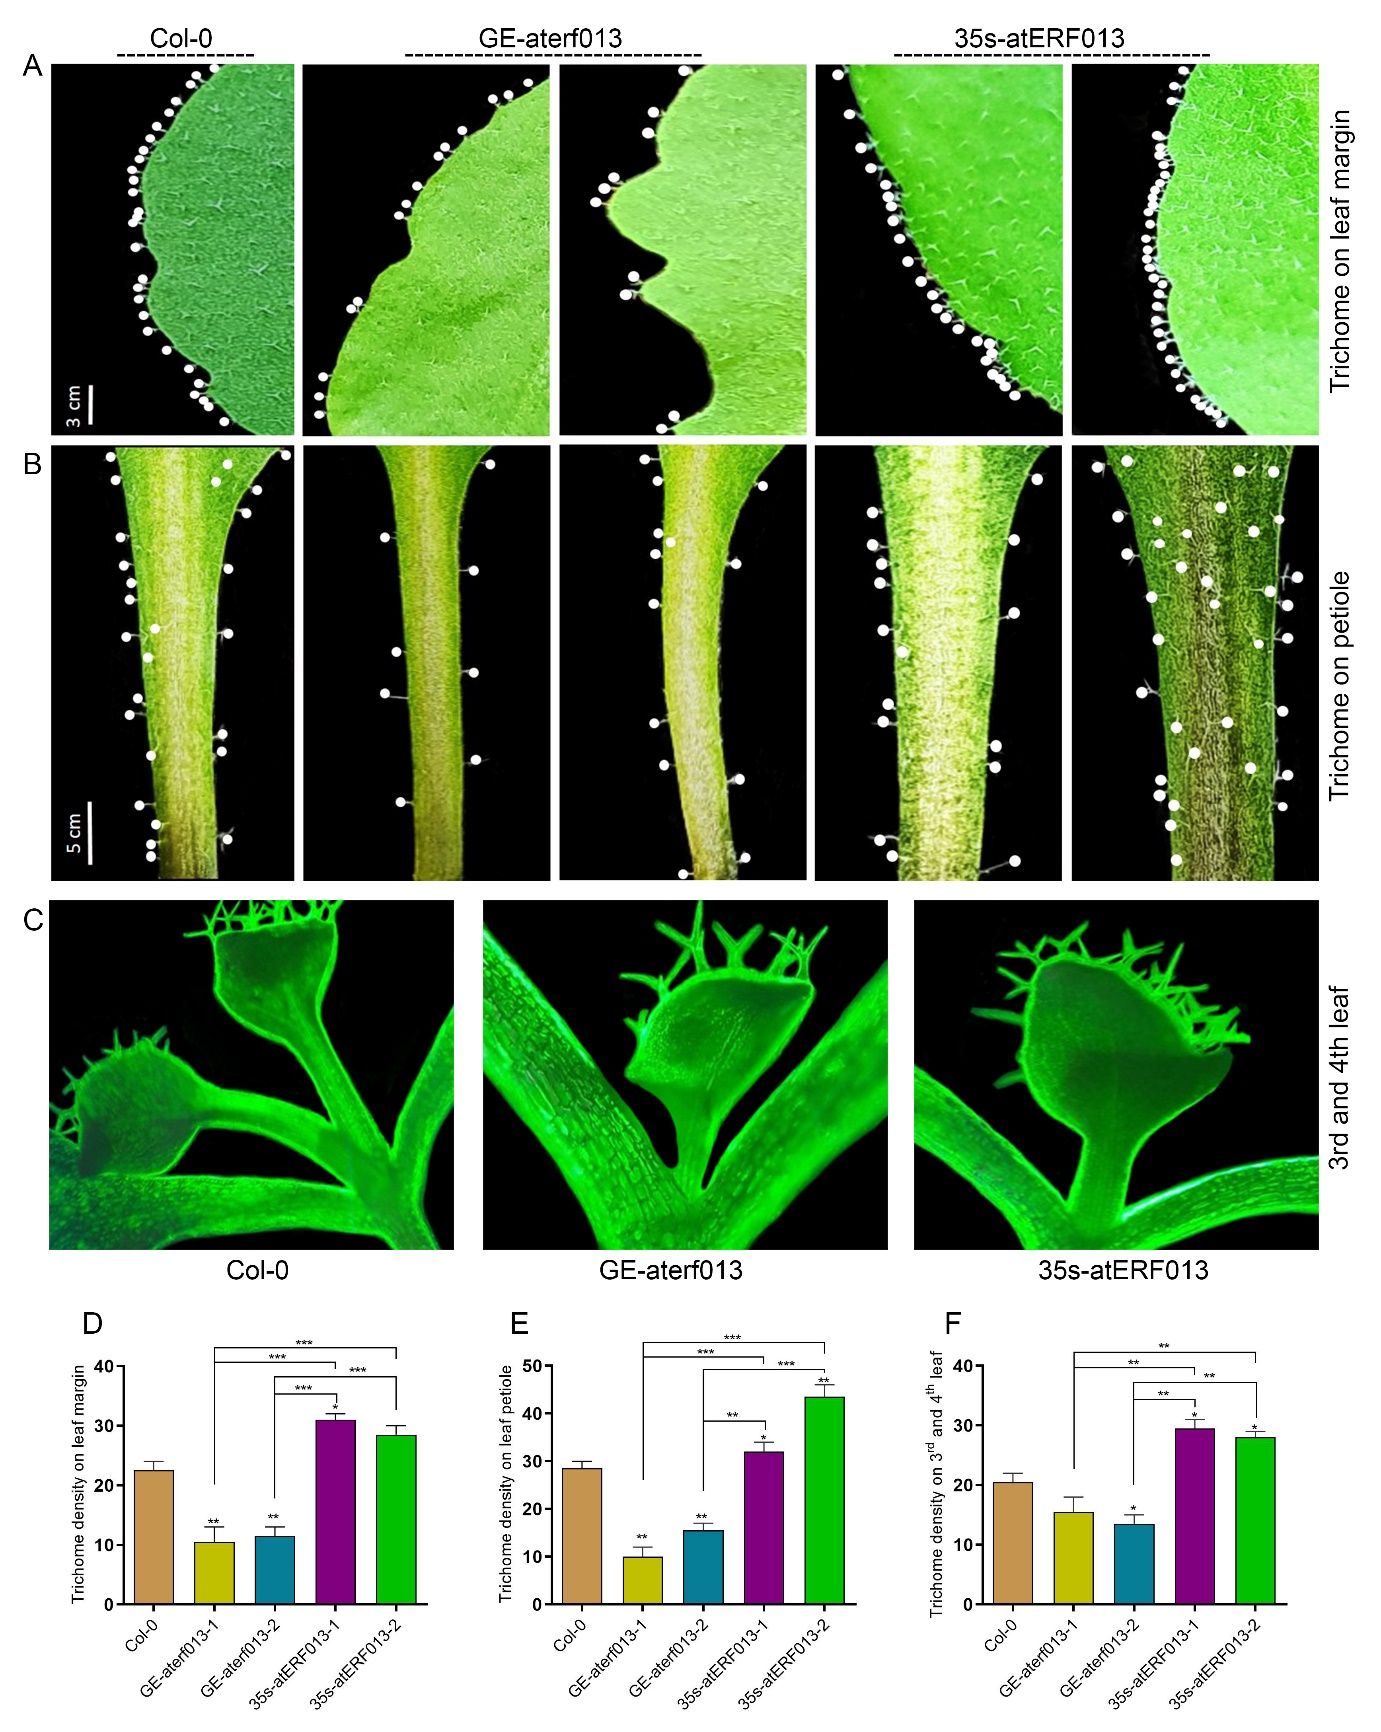


**Figure S4. *AtERF103* Regulates Trichome Development in Different Organs in *A. thaliana* under Standard Growth Conditions. (A–C)** Trichome visualization on leaf margin **(A)**, leaf petiole **(B)**, and the third and fourth leaves **(C)**. (**D–F)** Quantitative analysis of trichome density across these regions. Data are presented as mean ± standard deviation (SD) from 10 biological replicates. Statistical significance was determined using post hoc multiple comparisons, with significance levels indicated as **P < 0.05*, ***P < 0.01*, and ****P < 0.001*.


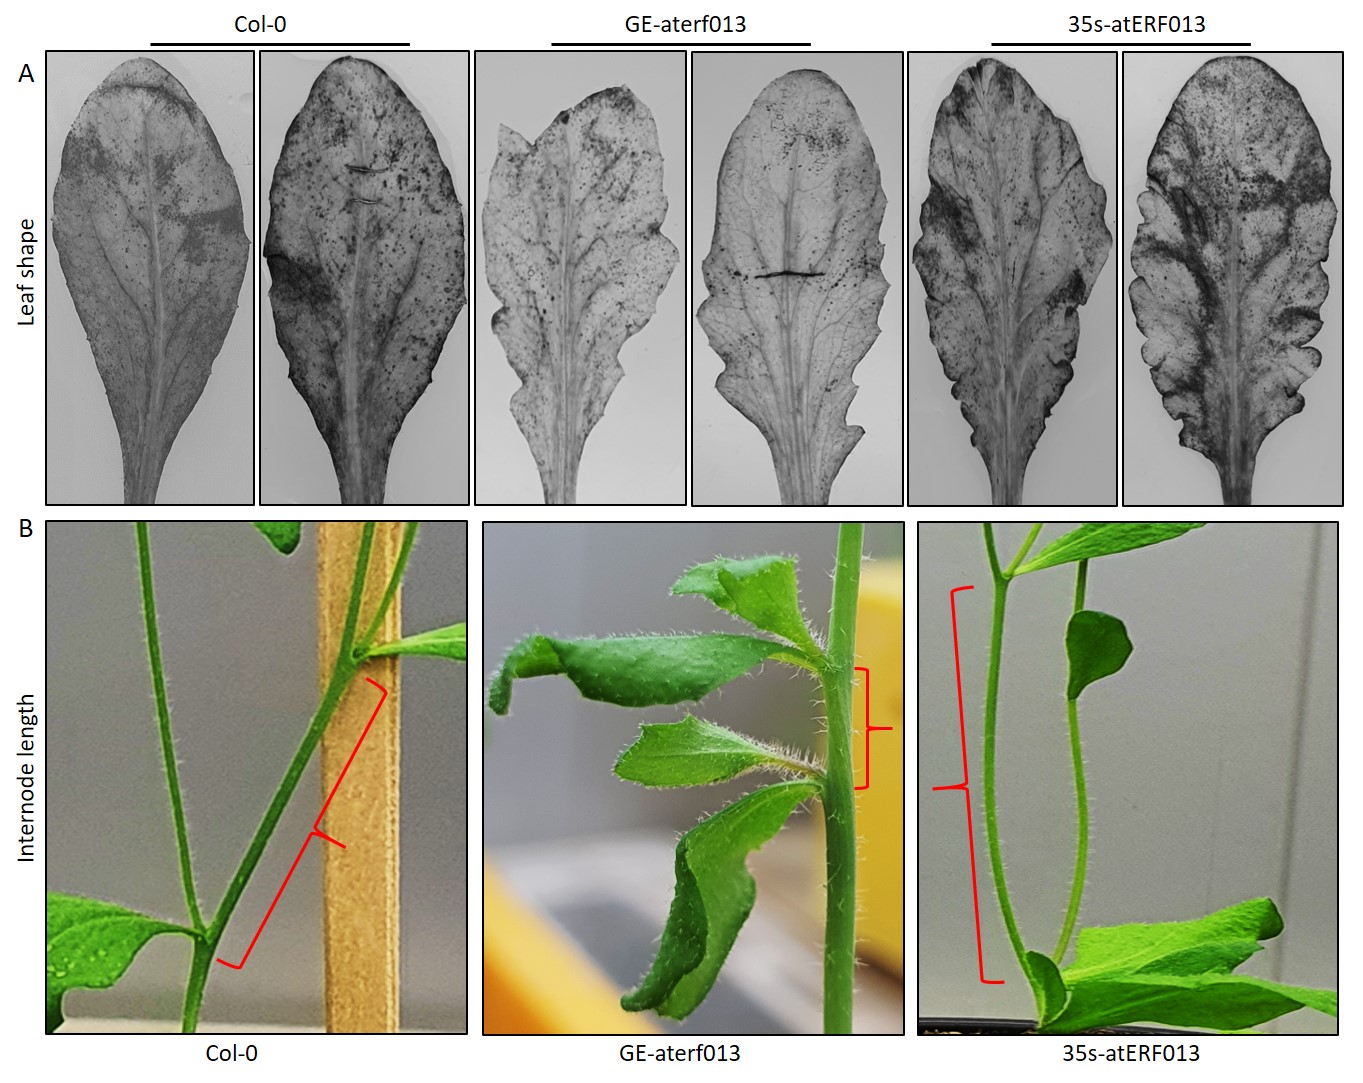


**Figure S5. *AtERF103* Modulates Leaf Morphology and Internode Length.** (A) Illustration of Leaf morphology of all the three genotypes. (B) Visualization of internode length variations among the three genotypes.


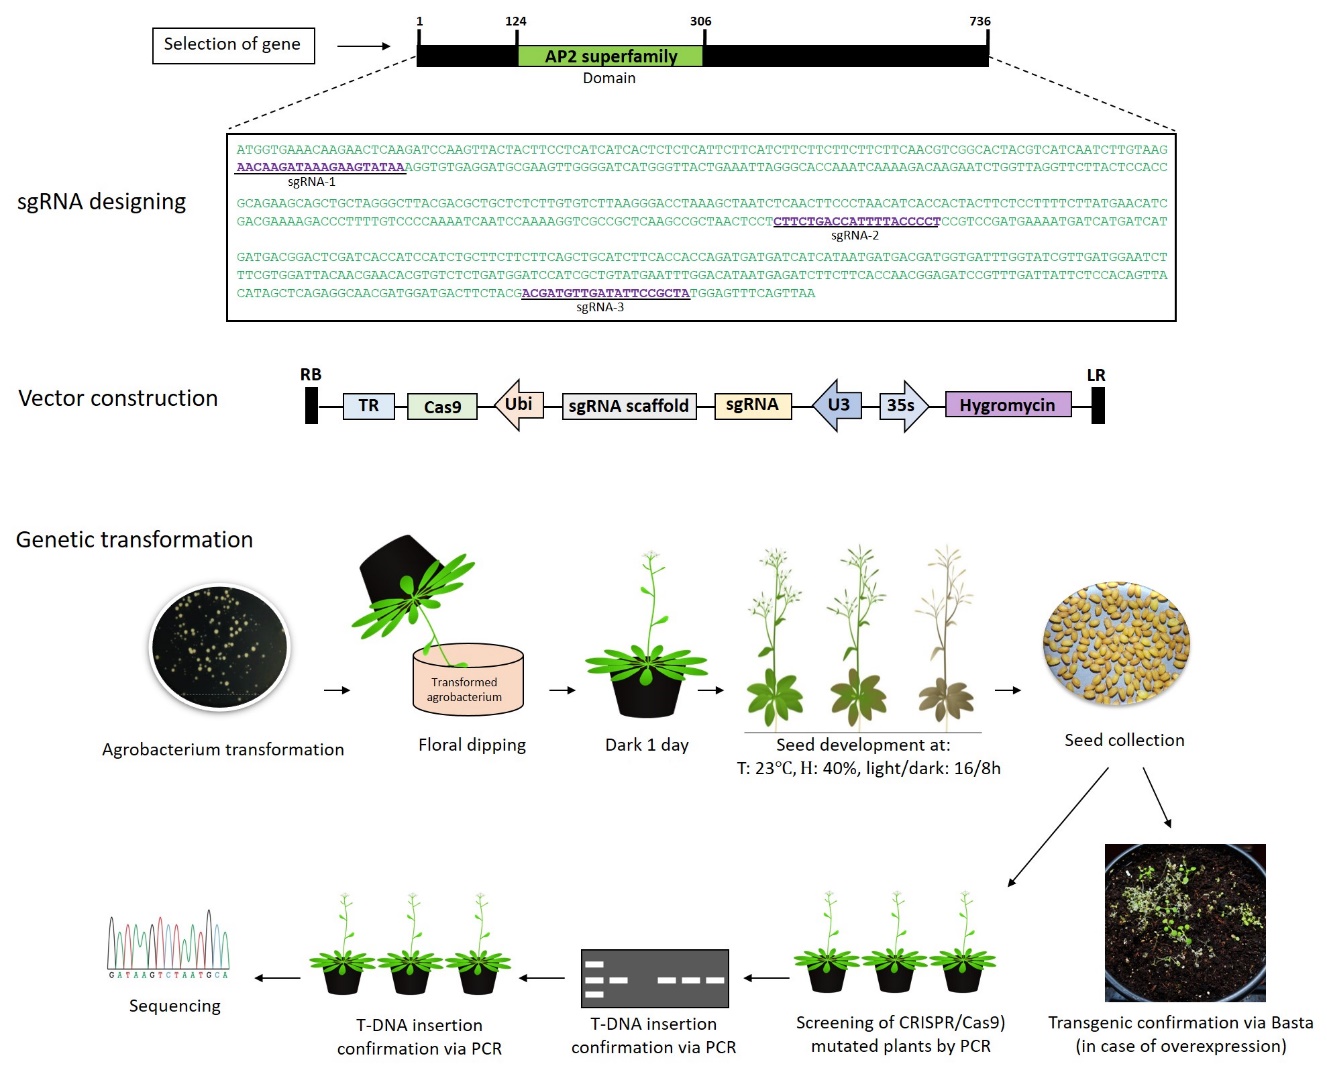


**Figure S6.** Schematic representation of the workflow for transgenic plant generation.
